# Supplementary material for: Diet and Meal Pattern Determinants of Glucose Levels and Variability in Adults with and without Prediabetes or Early-Onset Type 2 Diabetes: A Pilot Study
Source: MDPI journal article supplement (doi:10.3390/nu16091295), 2024-04-26
Supplement: s1 [file s1]

Contents

**Figure S1.** Study timeline ..... 1

**Figure S2.** Study flowchart ..... 2

**Table S1.** Inclusion and exclusion criteria in both cohorts..... 3

**Table S2.** Body composition as predictor of glucose parameters by continuous glucose monitor, adjusted for sex. .... 4

**Table S3.** Correlations between HOMA-IR and glucose parameters by continuous glucose monitor. .... 5

**Table S4.** Correlations between eating pattern and diet composition with HOMA-IR. .... 6

**Figure S1.** Study timeline

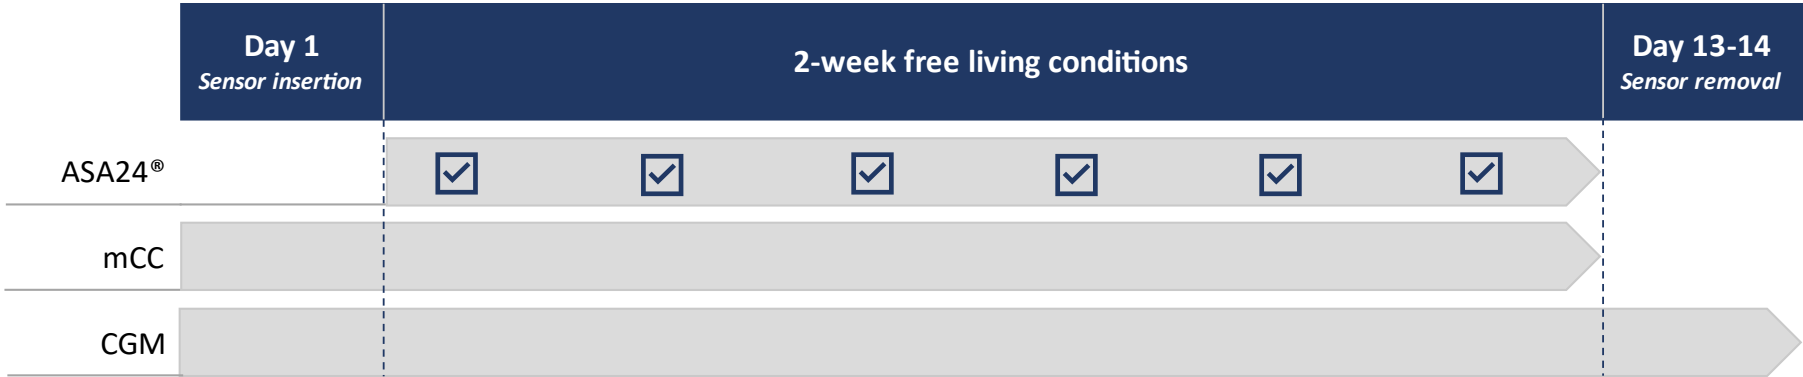

Study procedures timeline in both groups. Sensor insertion is defined as day of continuous glucose monitor (CGM) insertion, for N-GLYC, the CGM glucose data were used from day 2 to 14, in D-GLYC, CGM data only included days 2 to 12, as the diet was controlled on days 13 and 14. The Automated Self-Administered 24-hour® (ASA24®) were completed by each participant on non-consecutive weekdays and at least one weekend day over 2-week period, for a total of 3 to 6 recalls; the myCircadianClock phone application (mCC) was used daily by each participant to record time-stamped photos, in real time, of all food and caloric beverages immediately prior to ingestion.

**Figure S2.** Study flowchart

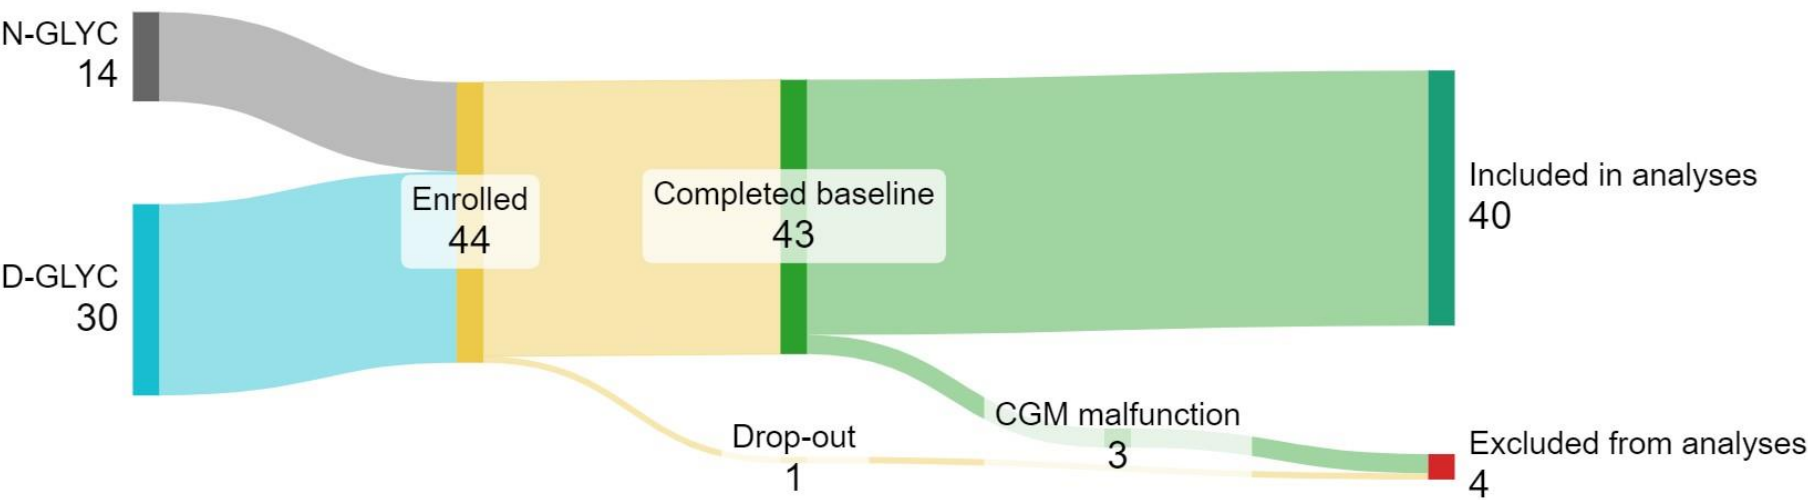

Participant selection process for N-GLYC and D-GLYC study analyses after consent. Abbreviations: CGM = continuous glucose monitor.

**Table S1.** Inclusion and exclusion criteria in both cohorts.

| N-GLYC                                                                                                                                                                                                 | D-GLYC                                                                                                                                                                                                                                                                                                 |
|--------------------------------------------------------------------------------------------------------------------------------------------------------------------------------------------------------|--------------------------------------------------------------------------------------------------------------------------------------------------------------------------------------------------------------------------------------------------------------------------------------------------------|
| <i>Inclusion criteria</i>                                                                                                                                                                              |                                                                                                                                                                                                                                                                                                        |
| Age: > 18 years old                                                                                                                                                                                    | Age: 50-75 years old                                                                                                                                                                                                                                                                                   |
| BMI >20, but less than <35, with weight stability within 5% for the 3 months preceding screening                                                                                                       | BMI ≥25 and ≤45kg/m <sup>2</sup> , with weight stability within 5% for the 3 months preceding screening                                                                                                                                                                                                |
| Self-reported fasting glucose <100 mg/dL, and/or HbA1c <5.7%                                                                                                                                           | History of prediabetes or T2D                                                                                                                                                                                                                                                                          |
| No history of prediabetes or type 2 diabetes (T2D), and absence of any glucose-lowering agents prescriptions                                                                                           | Fasting glucose ≥100 mg/dL, and/or HbA1c ≥5.7% and <7.5%                                                                                                                                                                                                                                               |
|                                                                                                                                                                                                        | Treatment with metformin and/or diet-controlled if T2D                                                                                                                                                                                                                                                 |
|                                                                                                                                                                                                        | Habitual prolonged eating window (≥14 hours)                                                                                                                                                                                                                                                           |
| Habitually eats breakfast                                                                                                                                                                              | Habitually eats breakfast                                                                                                                                                                                                                                                                              |
| No medical history of metabolic syndrome                                                                                                                                                               | Two or more of the following metabolic syndrome criteria:<br>- Diagnosis of hypertension on stable medication regimen<br>- Diagnosis of dyslipidemia on stable regimen<br>- HDL cholesterol men <40 mg/dL and women <50 mg/dL<br>- Waist circumference men: >102 cm (>40 40 in); women >88 cm (>35 in) |
| Sleep duration ≥6 hours, with habitual self-reported wake-up time >5:00 am and <11:00 am, and average self-reported bedtime before 2:00 am                                                             | Sleep duration ≥6 hours, with habitual self-reported wake-up time >5:00 am and <11:00 am, and average self-reported bedtime before 2:00 am                                                                                                                                                             |
|                                                                                                                                                                                                        | ≥70% of days with logging adherence (2 or more log entries/day separated by at least 5h), assessed during 2-week remote screening                                                                                                                                                                      |
| In possession of a smartphone                                                                                                                                                                          | In possession of a smartphone                                                                                                                                                                                                                                                                          |
| Lives in the New York City metro area                                                                                                                                                                  | Lives in the New York City metro area                                                                                                                                                                                                                                                                  |
| English fluency, since the smartphone application has not been translated                                                                                                                              | English fluency, since the smartphone application has not been translated                                                                                                                                                                                                                              |
| <i>Exclusion criteria</i>                                                                                                                                                                              |                                                                                                                                                                                                                                                                                                        |
| Sleep disorder, e.g. known obstructive sleep apnea (OSA), severe self-reported diagnosis of OSA, significant daytime symptoms of OSA, periodic limb movements of sleep, narcolepsy, or severe insomnia | Sleep disorder, e.g. known obstructive sleep apnea (OSA), severe OSA with apnea-hypopnea index >30 events/hour, significant daytime symptoms of OSA, periodic limb movements of sleep, narcolepsy, severe insomnia (a score ≥15 on Insomnia Severity Index)                                            |
| Current shift work or recent shift work in the last 6 months                                                                                                                                           | Current shift work or recent shift work in the last 6 months                                                                                                                                                                                                                                           |
| Travel during the observational period                                                                                                                                                                 | Travel more than one time zone during the intervention                                                                                                                                                                                                                                                 |
| Previous history of bariatric surgery or use of weight loss medication                                                                                                                                 | Previous history of bariatric surgery or use of weight loss medication                                                                                                                                                                                                                                 |
| Use of dietary supplements and/or medications known to affect sleep, circadian rhythms, or metabolic function                                                                                          | Use of dietary supplements and/or medications known to affect sleep, circadian rhythms, or metabolic function                                                                                                                                                                                          |
| Self-reported history of or current significant food intake or psychiatric disorder                                                                                                                    | History of or current significant food intake or psychiatric disorder (BDI score ≥29; BAI score ≥26)                                                                                                                                                                                                   |
| Excessive alcohol (women: >14 drinks/week; men: >21 drinks/week), smoking tobacco, or using illegal or recreational drugs                                                                              | Excessive alcohol (women: >14 drinks/week; men: >21 drinks/week), smoking tobacco, or using illegal or recreational drugs                                                                                                                                                                              |
| History of seizure disorder                                                                                                                                                                            | History of seizure disorder                                                                                                                                                                                                                                                                            |
| Unwilling/unable to provide informed consent                                                                                                                                                           | Unwilling/unable to provide informed consent                                                                                                                                                                                                                                                           |
|                                                                                                                                                                                                        | Severe food allergies                                                                                                                                                                                                                                                                                  |

Abbreviations: BMI = Body Mass Index; HbA1c = glycated hemoglobin; HDL = High-Density Lipoprotein; OSA = Obstructive Sleep Apnea; T2D = Type 2 Diabetes.

**Table S2.** Body composition as predictor of glucose parameters by continuous glucose monitor, adjusted for sex.

| Predictor           | FM (%) |       |       | FFM (%) |       |         |
|---------------------|--------|-------|-------|---------|-------|---------|
|                     | B      | SE    | Sig.  | B       | SE    | p value |
| Mean glucose        | -0.282 | 0.379 | 0.464 | 0.282   | 0.379 | 0.464   |
| Glucose variability | -0.018 | 0.283 | 0.950 | 0.018   | 0.283 | 0.950   |
| MAGE                | -0.004 | 0.769 | 0.996 | 0.004   | 0.769 | 0.996   |
| LAGE                | -0.098 | 1.645 | 0.953 | 0.098   | 1.645 | 0.953   |

Generalized linear model between body composition and glucose parameters by continuous glucose monitor (CGM) in the D-GLYC group (n = 26). Fat mass (FM) was assessed via quantitative magnetic resonance (QMR) under fasting condition in duplicate<sup>16</sup>; Fat-free mass (FFM) was calculated by subtracting FM from body weight. The percentage of FM was calculated as the total FM (kg) by QMR divided by total body weight; the percentage of FFM was calculated as the total FFM (kg) divided by total body weight. FM and FFM associations were adjusted for sex, to eliminate biological confounders from differences in FM/FFM distribution between sexes. Significance set at  $p < 0.05$ . Glucose variability defined as glucose SD.

Abbreviations: FFM = fat-free mass; FM= fat mass LAGE = largest amplitude of glycemic excursions; MAGE = mean amplitude of glycemic excursions.

**Table S3.** Correlations between HOMA-IR and glucose parameters by continuous glucose monitor.

| Glucose parameter   | HOMA-IR     |         |
|---------------------|-------------|---------|
|                     | Coefficient | p value |
| Mean glucose        | 0.073       | 0.724   |
| Glucose variability | -0.245      | 0.227   |
| MAGE                | -0.240      | 0.237   |
| LAGE                | -0.345      | 0.084   |

Correlations between HOMA-IR and glucose parameters by continuous glucose monitor in the D-GLYC group (n = 26). Glucose variability defined as glucose SD. Significance set at  $p < 0.05$ . Abbreviations: HOMA-IR = Homeostatic Model Assessment for Insulin Resistance; LAGE = largest amplitude of glucose excursions; MAGE = mean amplitude of glucose excursions.

**Table S4.** Correlations between eating pattern and diet composition with HOMA-IR.

| Predictors       | Variable           | HOMA-IR      |             |
|------------------|--------------------|--------------|-------------|
|                  |                    | Coefficient  | p value     |
| Eating pattern   | Daily EO           | -0.04        | 0.84        |
|                  | Eating window, hrs | 0.23         | 0.25        |
|                  | First EO           | 0.04         | 0.86        |
|                  | Last EO            | 0.17         | 0.40        |
|                  | Eating midpoint    | 0.17         | 0.42        |
| Diet composition | Calories           | -0.27        | 0.18        |
|                  | CHO, gr            | -0.38        | 0.06        |
|                  | CHO, %             | -0.22        | 0.27        |
|                  | Fiber              | <b>-0.44</b> | <b>0.03</b> |
|                  | Fiber-to-CHO       | -0.32        | 0.12        |
|                  | Sugar              | -0.32        | 0.11        |
|                  | Sugar-to-CHO       | 0.21         | 0.31        |
|                  | Protein, gr        | -0.08        | 0.68        |
|                  | Protein, %         | 0.17         | 0.40        |
|                  | Total fat, gr      | -0.12        | 0.57        |
|                  | Total fat, %       | 0.21         | 0.29        |
|                  | ETOH, gr           | <b>-0.41</b> | <b>0.04</b> |

| Predictors       | Variable            | HOMA-IR      |             |
|------------------|---------------------|--------------|-------------|
|                  |                     | Coefficient  | p value     |
| Eating pattern   | Daily EO, SD        | 0.02         | 0.94        |
|                  | First EO, SD        | 0.04         | 0.85        |
|                  | Last EO, SD         | 0.09         | 0.66        |
|                  | Eating midpoint, SD | 0.07         | 0.75        |
| Diet composition | Calories, SD        | -0.05        | 0.80        |
|                  | CHO, gr, SD         | -0.30        | 0.14        |
|                  | CHO, %, SD          | -0.08        | 0.70        |
|                  | Fiber, SD           | <b>-0.53</b> | <b>0.01</b> |
|                  | Fiber-to-CHO, SD    | -0.37        | 0.06        |
|                  | Sugar, SD           | -0.23        | 0.25        |
|                  | Sugar-to-CHO, SD    | -0.17        | 0.41        |
|                  | Protein, gr, SD     | -0.14        | 0.50        |
|                  | Protein, %, SD      | 0.07         | 0.75        |
|                  | Total fat, gr, SD   | 0.05         | 0.80        |
|                  | Total fat, %, SD    | -0.07        | 0.74        |
|                  | ETOH, gr, SD        | -0.36        | 0.07        |

Correlations between eating patterns and diet composition with HOMA-IR in the D-GLYC group (n = 26). Left, eating pattern and dietary composition over two weeks correlations with HOMA-IR. Right, eating pattern and dietary composition variability over two weeks correlations with HOMA-IR. Significance shown in bold. Abbreviations: CHO = carbohydrate; EO = eating occasion; ETOH = alcohol; HOMA-IR = Homeostatic Model Assessment for Insulin Resistance.
